# Supplementary material for: A high rate of COVID-19 vaccine hesitancy in a large-scale survey on Arabs
Source: eLife journal article supplement (doi:10.7554/elife.68038), 2021-05-27
Supplement: supp [file elife-68038-supp-v1.zip]

**Table 1 supplementary.** Differences in Barriers for Acceptance according to Country of Residence, Gender and Academic Achievement, compared using chi-square test.

| Question                                          | Country        |                 |         | Gender       |              |         | Academic Education |                 |         |
|---------------------------------------------------|----------------|-----------------|---------|--------------|--------------|---------|--------------------|-----------------|---------|
|                                                   | Arab countries | Other countries | p       | Female       | Male         | p       | Higher education   | Lower education | p       |
|                                                   | 25884 (84.1)   | 4895 (15.9)     |         | 12804 (41.6) | 17975 (58.4) |         | 18942 (61.5)       | 11837 (38.5)    |         |
| <b>I had/have COVID</b>                           | 2820 (86.7)    | 434 (13.3)      | NS      | 1271 (39.1)  | 1983 (60.9)  | <0.0001 | 2124 (65.3)        | 1130 (34.7)     | <0.001  |
| <b>Afraid of unknown side effects</b>             | 17505 (83.7)   | 3405 (16.3)     | <0.0001 | 8777 (42.0)  | 12133 (58.0) | <0.0001 | 13211 (63.2)       | 7699 (36.8)     | <0.0001 |
| <b>I am not eligible (pregnant or &lt;16 old)</b> | 841 (83.9)     | 161 (16.1)      | <0.0001 | 843 (84.1)   | 159 (15.9)   | <0.0001 | 591 (59.0)         | 411 (41.0)      | <0.0001 |
| <b>Infection rate decreasing</b>                  | 2971 (90.9)    | 299 (9.1)       | <0.001  | 1387 (42.4)  | 1883 (57.6)  | <0.0001 | 2104 (64.3)        | 1166 (35.7)     | <0.001  |
| <b>Vaccine production was rushed</b>              | 13571 (84.6)   | 2474 (15.4)     | <0.0001 | 6899 (43.0)  | 9146 (57.0)  | <0.0001 | 10480 (65.3)       | 5565 (34.7)     | <0.0001 |
| <b>Most people already had COVID</b>              | 1925 (90.0)    | 215 (10.0)      | <0.0001 | 1022 (47.8)  | 1118 (52.2)  | <0.0001 | 1301 (60.8)        | 839 (39.2)      | NS      |
| <b>Most infected people recover</b>               | 6395 (83.7)    | 1242 (16.3)     | NS      | 2995 (39.2)  | 4642 (60.8)  | <0.0001 | 4746 (62.1)        | 2891 (37.9)     | <0.0001 |
| <b>Do not think I will get COVID19</b>            | 587 (86.3)     | 93 (13.7)       | <0.0001 | 204 (30.0)   | 476 (70.0)   | <0.0001 | 309 (45.4)         | 371 (54.6)      | <0.0001 |
| <b>Vaccines contain Aluminum</b>                  | 2579 (83.8)    | 497 (16.2)      | <0.0001 | 1583 (51.5)  | 1493 (48.5)  | NS      | 1944 (63.2)        | 1132 (36.8)     | <0.0001 |
| <b>Do not believe in vaccines in general</b>      | 3681 (83.0)    | 756 (17.0)      | <0.0001 | 2031 (45.8)  | 2406 (54.2)  | <0.05   | 2603 (58.7)        | 1834 (41.3)     | <0.0001 |
| <b>Coronavirus/vaccine are conspiracy</b>         | 5463 (84.6)    | 996 (15.4)      | <0.0001 | 2977 (46.1)  | 3482 (53.9)  | <0.05   | 3851 (59.6)        | 2608 (40.4)     | <0.0001 |
| <b>No published studies on vaccine</b>            | 5991 (89.5)    | 702 (10.5)      | <0.0001 | 3156 (47.2)  | 3537 (52.8)  | NS      | 4305 (64.3)        | 2388 (35.7)     | <0.05   |
| <b>Insufficient numbers on studies</b>            | 8083 (86.0)    | 1312 (14.0)     | <0.0001 | 4488 (47.8)  | 4907 (52.2)  | <0.05   | 6072 (64.6)        | 3323 (35.4)     | <0.001  |
| <b>Do not trust company/studies</b>               | 9974 (86.0)    | 1617 (14.0)     | <0.0001 | 5060 (43.7)  | 6531 (56.3)  | <0.0001 | 7306 (63.0)        | 4285 (37.0)     | <0.05   |
| <b>Pandemic is exaggerated to benefit pharma</b>  | 7185 (83.5)    | 1420 (16.5)     | <0.001  | 3566 (41.4)  | 5039 (58.6)  | <0.0001 | 5614 (65.2)        | 2991 (34.8)     | <0.0001 |

|                                                                        |                 |             |         |                |                 |         |              |             |         |
|------------------------------------------------------------------------|-----------------|-------------|---------|----------------|-----------------|---------|--------------|-------------|---------|
| <b>No value for new strains</b>                                        | 6231 (84.1)     | 1176 (15.9) | <0.0001 | 3660<br>(49.4) | 3747<br>(50.6)  | <0.0001 | 4759 (64.3)  | 2648 (35.7) | NS      |
| <b>May get COVID19 after<br/>Vaccine<br/>Vaccine immunity is short</b> | 1240 (79.6)     | 318 (20.4)  | <0.0001 | 697 (44.7)     | 861 (55.3)      | NS      | 985 (63.2)   | 573 (36.8)  | <0.05   |
| <b>Vaccine may cause death</b>                                         | 3507 (83.4)     | 700 (16.6)  | <0.0001 | 1827<br>(43.4) | 2380<br>(56.6)  | <0.0001 | 2895 (68.8)  | 1312 (31.2) | <0.0001 |
| <b>I have allergies to foods/drugs</b>                                 | 3929 (84.4)     | 725 (15.6)  | <0.0001 | 2220<br>(47.7) | 2434<br>(52.3)  | <0.0001 | 2825 (60.7)  | 1829 (39.3) | <0.001  |
| <b>Most vaccinated people had SE</b>                                   | 658 (84.5)      | 121 (15.5)  | <0.0001 | 435 (55.8)     | 344 (44.2)      | <0.05   | 502 (64.4)   | 277 (35.6)  | <0.0001 |
| <b>Afraid of SE mentioned in<br/>studies</b>                           | 2415 (85.9)     | 396 (14.1)  | <0.0001 | 1390<br>(49.4) | 1421<br>(50.6)  | <0.05   | 1679 (59.7)  | 1132 (40.3) | NS      |
| <b>Vaccines irreversibly alter DNA</b>                                 | 5276 (85.6)     | 887 (14.4)  | <0.0001 | 2965<br>(48.1) | 3198<br>(51.9)  | <0.0001 | 3582 (58.1)  | 2581 (41.9) | <0.0001 |
| <b>I have a chronic disease</b>                                        | 6388 (84.1)     | 1209 (15.9) | <0.0001 | 3464<br>(45.6) | 4133<br>(54.4)  | <0.05   | 4726 (62.2)  | 2871 (37.8) | <0.0001 |
| <b>Vaccine can cause COVID19</b>                                       | 1111 (84.4)     | 206 (15.6)  | <0.0001 | 653 (49.6)     | 664 (50.4)      | <0.05   | 833 (63.2)   | 484 (36.8)  | <0.0001 |
| <b>I don't like needles</b>                                            | 5463 (85.5)     | 926 (14.5)  | <0.0001 | 3058<br>(47.9) | 3331<br>(52.1)  | <0.0001 | 3703 (58.0)  | 2686 (42.0) | <0.05   |
| <b>Vaccines were not tested in<br/>Arabs</b>                           | 1517 (86.4)     | 238 (13.6)  | <0.0001 | 965 (55.0)     | 790 (45.0)      | <0.05   | 910 (51.9)   | 845 (48.1)  | <0.0001 |
| <b>Not enough time to test vaccine<br/>safety</b>                      | 2255 (87.5)     | 323 (12.5)  | <0.0001 | 1264<br>(49.0) | 1314<br>(51.0)  | <0.001  | 1578 (61.2)  | 1000 (38.8) | <0.05   |
| <b>Do not trust the healthcare<br/>policies</b>                        | 15887<br>(83.7) | 3102 (16.3) | <0.0001 | 8564<br>(45.1) | 10425<br>(54.9) | <0.05   | 12292 (64.7) | 6697 (35.3) | <0.0001 |
|                                                                        | 12373<br>(92.8) | 959 (7.2)   | <0.0001 | 5512<br>(41.3) | 7820<br>(58.7)  | <0.0001 | 8380 (62.9)  | 4952 (37.1) | <0.0001 |
